# Supplementary material
Source: PubMed Central journal article supplement (PMC2396528)
Supplement: NIHMS45858-supplement.pdf [file NIHMS45858-supplement.pdf]

**Supporting Information for**

**Iron Complexes of Dendrimer-Appended**

**Carboxylates for Activating Dioxygen and Oxidizing**

**Hydrocarbons**

*Min Zhao<sup>1</sup>, Brett Helms<sup>2</sup>, Elena Slonkina<sup>3</sup>, Simone Friedle<sup>1</sup>, Dongwhan Lee<sup>1</sup>, Jennifer DuBois<sup>3</sup>,  
Britt Hedman<sup>3\*</sup>, Keith O. Hodgson<sup>3\*</sup>, Jean M. J. Fréchet<sup>2\*</sup>, and Stephen J. Lippard<sup>1\*</sup>*

<sup>1</sup>Department of Chemistry, Massachusetts Institute of Technology, 77 Massachusetts Avenue,  
Cambridge, MA 02139

<sup>2</sup>Department of Chemistry, University of California, 718 Latimer Hall, Berkeley, CA 94720-  
1460

<sup>3</sup>Department of Chemistry and Stanford Synchrotron Radiation Laboratory, Stanford University,  
Stanford, CA 94305

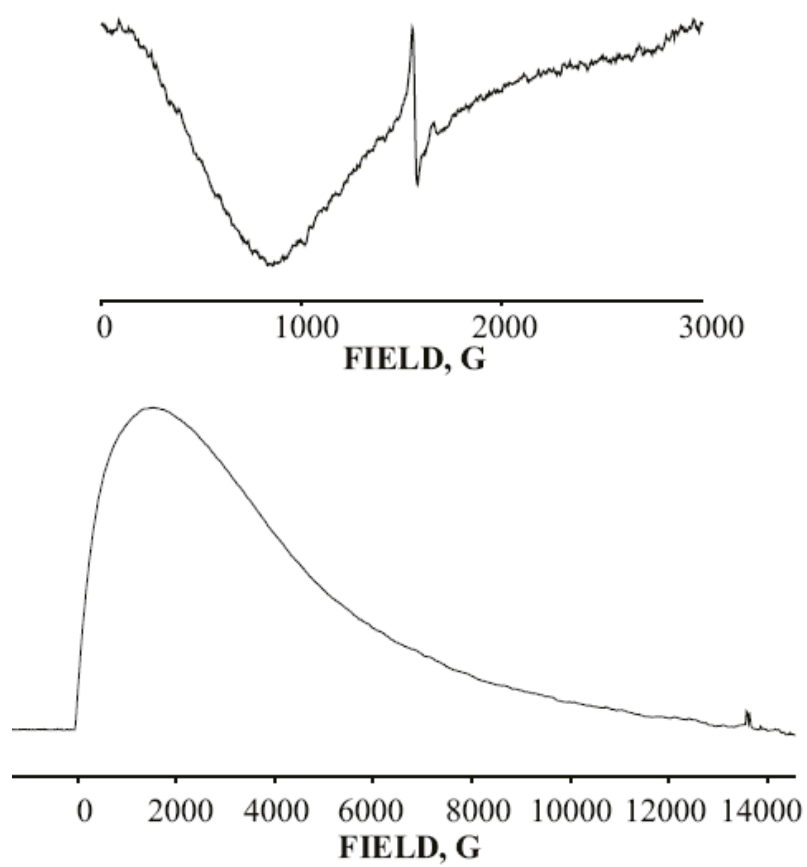

**Figure S1.** X-band (top, 3.7 K, 9.367 GHz, 13 db) and Q-band (bottom, 2 K, 35.251 GHz, 20 db) EPR spectra of compound **9-P** in frozen toluene solution.

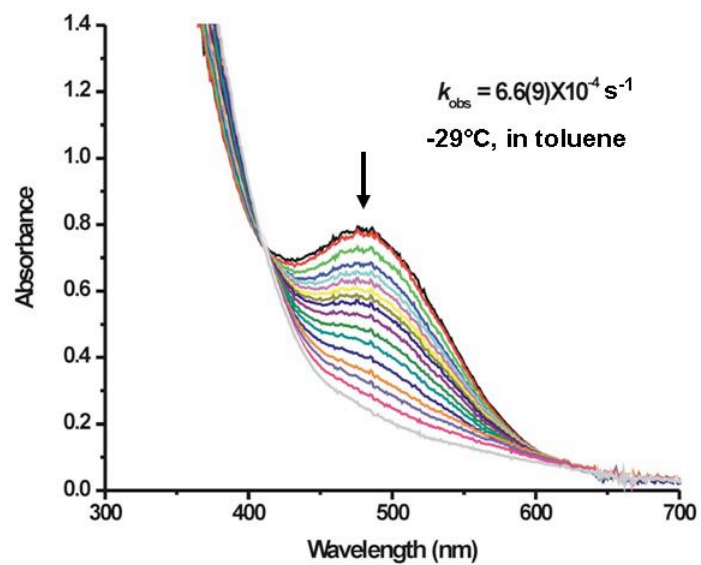

**Figure S2.** Optical changes when **9-CN** reacts with O<sub>2</sub> in toluene at -29 °C. The spectra were recorded every 30 s up to 15 min, and with an increment of 20% in the cycle time afterwards.

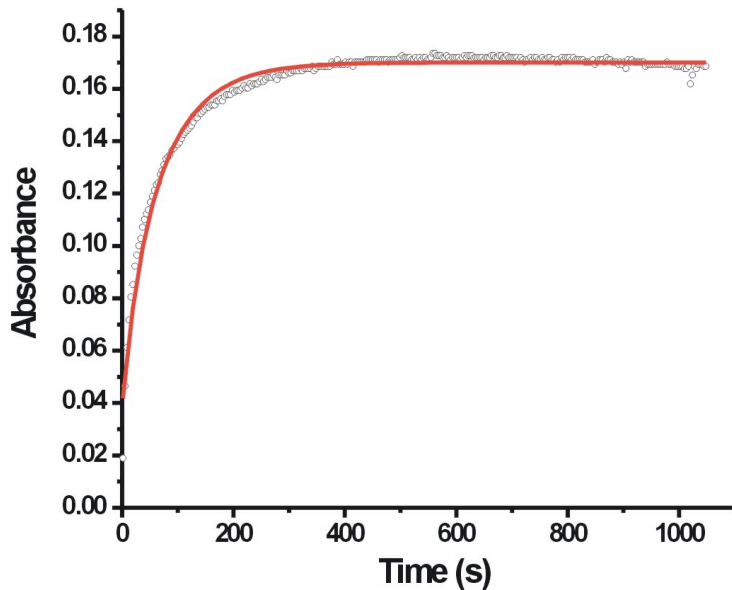

**Figure S3.** Plot of the evolution in absorbance at 442 nm after mixing **9**-P (0.0376 mM in CH<sub>2</sub>Cl<sub>2</sub>) with a large excess of dioxygen at 20 °C. The data were fit to eq. 1 fixing  $\epsilon_{10}$  as 6000 cm<sup>-1</sup>M<sup>-1</sup> and  $\epsilon_{9-P}$  as 1000 cm<sup>-1</sup> M<sup>-1</sup> to afford  $k_1' = 0.0132(8)$  s<sup>-1</sup>,  $k_2 = 0.04(2)$  s<sup>-1</sup>, , and  $\epsilon_{11} = 4523(5)$  cm<sup>-1</sup> M<sup>-1</sup>.

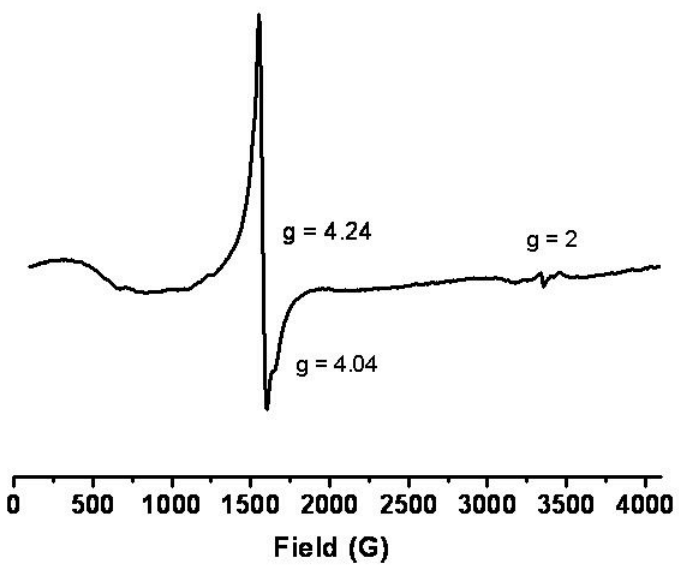

**Figure S4.** X-band EPR spectrum of a toluene sample of **9-P** at 4.2 K.

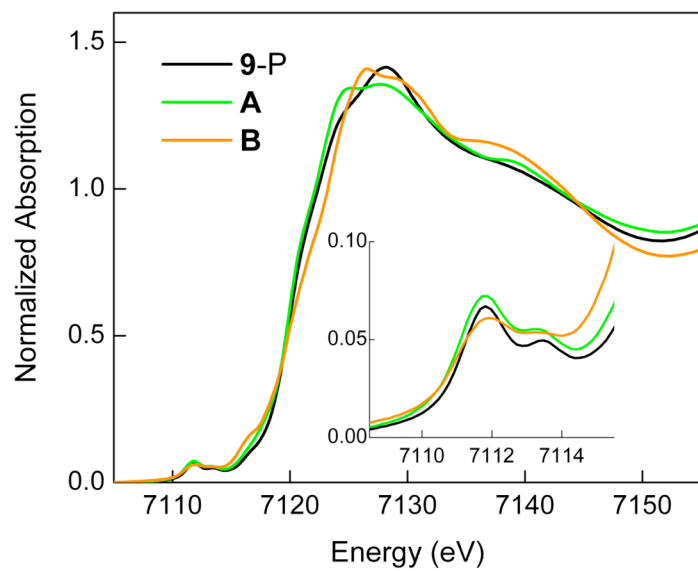

**Figure S5.** Fe K-edge XAS spectra for **9-P** (black), **A** (green), and **B** (orange). The inset shows the magnified pre-edge region.

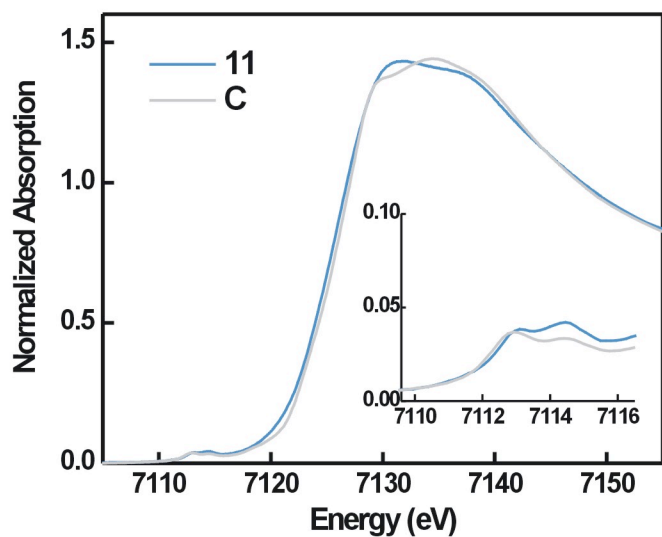

**Figure S6.** Fe K-edge XAS spectra for **11** (blue) and **C** (gray). The inset shows the magnified pre-edge region.

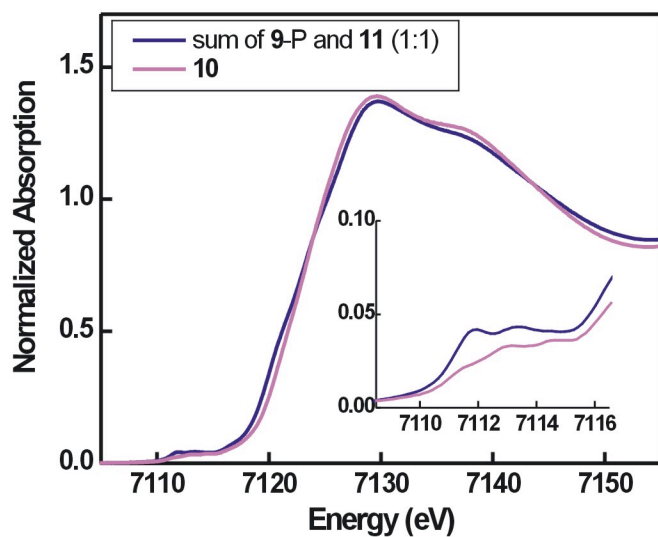

**Figure S7.** Simulated spectrum of a 1:1 mixture of **9-P** and **11** (navy) and experimental spectrum of **10** (magenta). The inset shows the magnified pre-edge region.



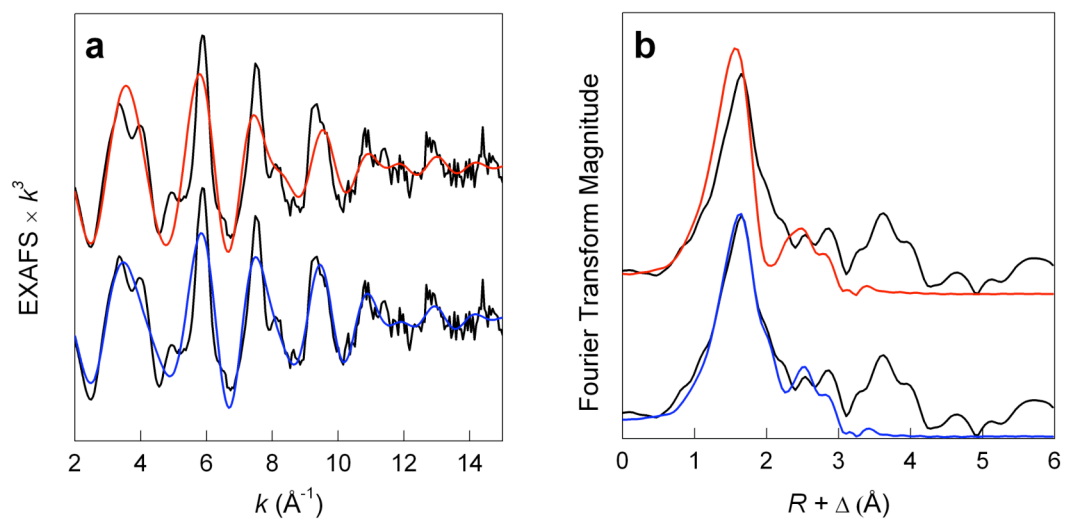

**Figure S8.** (a) EXAFS and (b) Fourier transforms of **9-P** (black) and (top to bottom) Fits 1 (red) and 2 (blue) from Table 2.

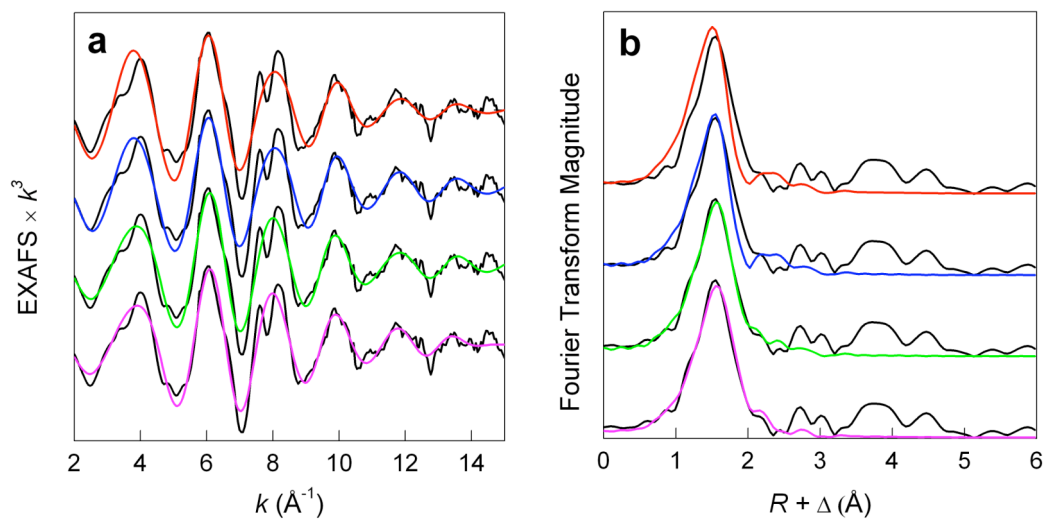

**Figure S9.** (a) EXAFS and (b) Fourier transforms of A (black) and (top to bottom) Fits 1 (red), 2 (blue), 3 (green), 4 (magenta) from Table S1.

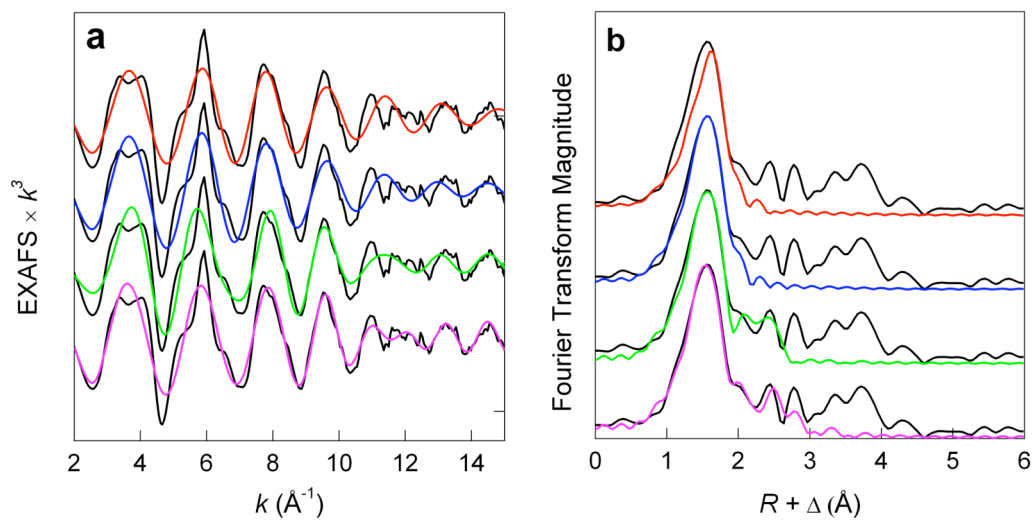

**Figure S10.** (a) EXAFS and (b) Fourier transforms of **B** (black) and (top to bottom) Fits 1 (red), 2 (blue), 3 (green), 4 (magenta) from Table S2.

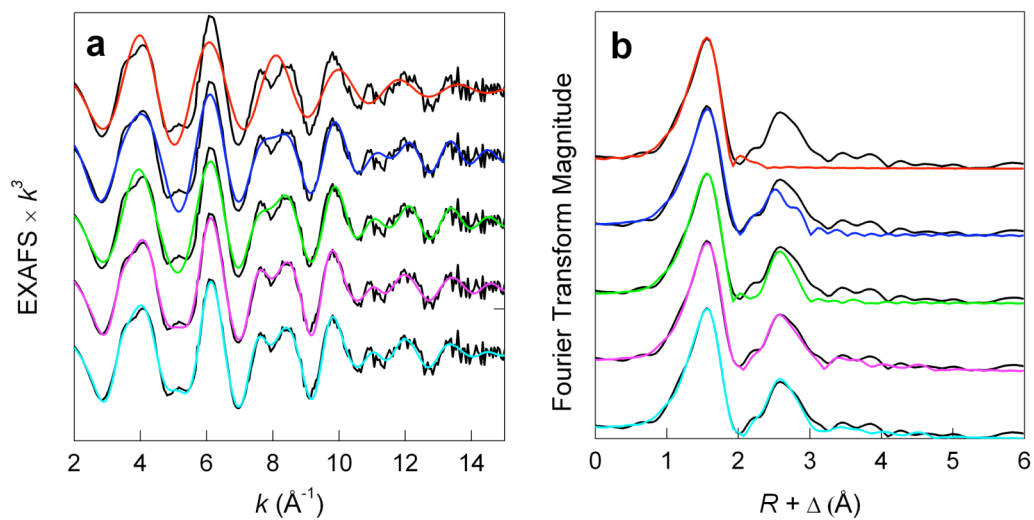

**Figure S11.** (a) EXAFS and (b) Fourier transforms of **11** (black) and (top to bottom) Fits 1 (red), 2 (blue), 3 (green), 4 (magenta), and 5 (cyan) from Table S3.

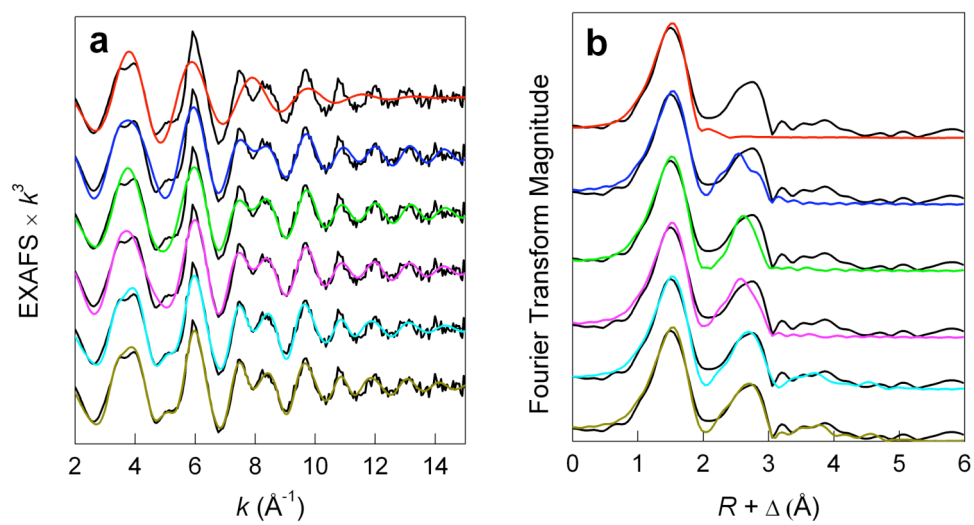

**Figure S12.** (a) EXAFS and (b) Fourier transforms of **10** (black) and (top to bottom) Fits 1 (red), 2 (blue), 3 (green), 4 (magenta), 5 (cyan) and 6 (dark yellow) from Table S4.

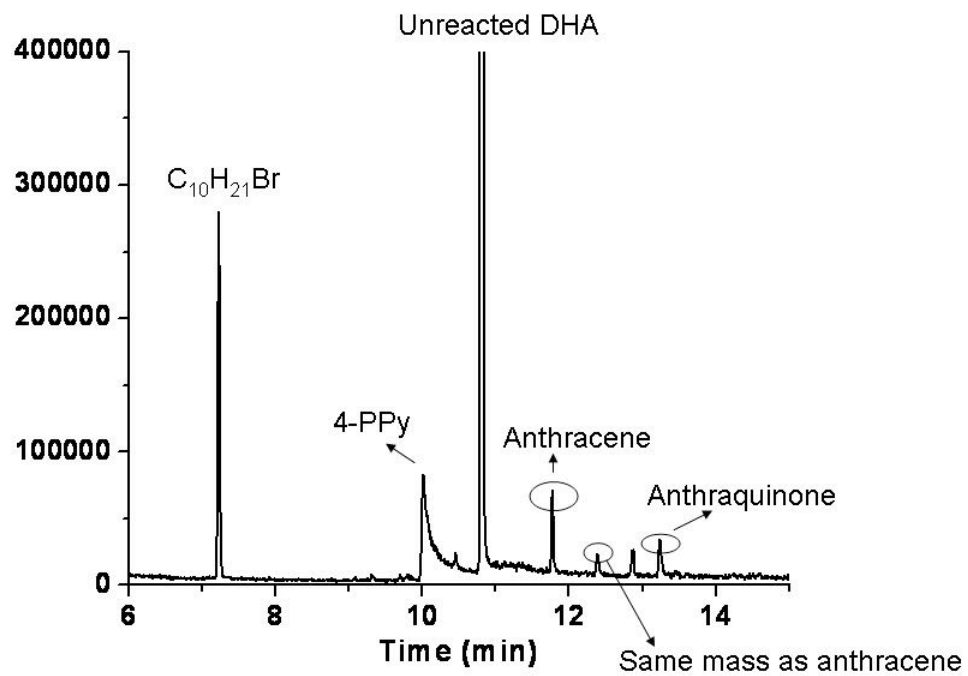

**Figure S13.** A typical total ion chromatogram from reaction of 9-P and dihydroanthracene.

**Table S1.** EXAFS Fit Results for A.<sup>a</sup>

| Fit number |                    | $R$ (Å) | $R$ (Å)                        | $\sigma^2 \times 10^6$ (Å <sup>2</sup> ) | $F^c$ |
|------------|--------------------|---------|--------------------------------|------------------------------------------|-------|
|            |                    | (EXAFS) | (crystallography) <sup>b</sup> |                                          |       |
| 1          | 5 O/N <sup>d</sup> | 2.00    | 2.03                           | 890                                      | 0.399 |
|            | 4 C                | 2.97    | 3.04                           | 1090                                     |       |
| 2          | 4 O/N              | 2.00    | 2.03                           | 710                                      | 0.356 |
|            | 4 C                | 2.98    | 3.04                           | 1100                                     |       |
| 3          | 4 O/N              | 2.00    | 2.03                           | 720                                      | 0.314 |
|            | 2 C/O              | 2.44    | 2.44                           | 880                                      |       |
|            | 4 C                | 2.97    | 3.04                           | 1100                                     |       |
| 4          | 4 O/N              | 2.00    | 2.03                           | 730                                      | 0.314 |
|            | 1 O                | 2.35    | 2.36                           | 450                                      |       |
|            | 1 C                | 2.53    | 2.53                           | 330                                      |       |
|            | 4 C                | 2.97    | 3.04                           | 1400                                     |       |

<sup>a</sup> Errors are estimated to be 25 % for coordination numbers and 0.01 – 0.03 Å for distances.

<sup>b</sup> *JACS*, **1998**, *120*, 12153-12154.

<sup>c</sup> Error ( $F$ ) is defined as  $F = [\sum k^6 (\chi_{\text{exptl}} - \chi_{\text{calcd}})^2] / [\sum k^6 \chi_{\text{exptl}}^2]$ .

<sup>d</sup> Scatterers differing by  $Z = \pm 1$  are not distinguishable by EXAFS. The first element in a pair indicates the type of atom used to model the backscattered wave in the theoretical fit.

**Table S2.** EXAFS Fit Results for **B**.<sup>a</sup>

| Fit number |                    | $R$ (Å)<br>(EXAFS) | $R$ (Å)<br>(crystallography) <sup>b</sup> | $\sigma^2 \times 10^6$ (Å <sup>2</sup> ) | $F^c$ |
|------------|--------------------|--------------------|-------------------------------------------|------------------------------------------|-------|
| 1          | 5 O/N <sup>c</sup> | 2.08               | 2.09                                      | 580                                      | 0.446 |
|            | 6 C                | 2.98               | 3.00                                      | 5080                                     |       |
| 2          | 2 O                | 1.99               | 2.03                                      | 300                                      | 0.416 |
|            | 3 O/N              | 2.10               | 2.13                                      | 280                                      |       |
|            | 6 C                | 2.92               | 3.00                                      | 3900                                     |       |
| 3          | 2 O                | 1.98               | 2.03                                      | 280                                      | 0.408 |
|            | 3 O/N              | 2.09               | 2.13                                      | 260                                      |       |
|            | 1 Fe               | 2.76               | 2.82                                      | 840                                      |       |
| 4          | 2 O                | 1.99               | 2.03                                      | 240                                      | 0.334 |
|            | 3 O/N              | 2.11               | 2.13                                      | 250                                      |       |
|            | 1 Fe               | 2.77               | 2.82                                      | 490                                      |       |
|            | 6 C                | 2.97               | 3.00                                      | 660                                      |       |

<sup>a</sup> Errors are estimated to be 25 % for coordination numbers and 0.01 – 0.03 Å for distances.

<sup>b</sup> *JACS*, **1999**, *121*, 9893-9894.

<sup>c</sup> Error ( $F$ ) is defined as  $F = [\sum k^6 (\chi_{\text{exptl}} - \chi_{\text{calcd}})^2] / [\sum k^6 \chi_{\text{exptl}}^2]$ .

<sup>d</sup> Scatterers differing by  $Z = \pm 1$  are not distinguishable by EXAFS. The first element in a pair indicates the type of atom used to model the backscattered wave in the theoretical fit.



**Table S3.** EXAFS Fit Results for **11.**<sup>a</sup>

| Fit number |                    | $R$ (Å) | $\sigma^2 \times 10^6$ (Å <sup>2</sup> ) | $F^b$ |
|------------|--------------------|---------|------------------------------------------|-------|
| 1          | 6 O/N <sup>c</sup> | 2.00    | 830                                      | 0.464 |
| 2          | 6 O/N              | 2.02    | 840                                      | 0.298 |
|            | 5 C                | 3.00    | 270                                      |       |
| 3          | 6 O/N              | 2.01    | 830                                      | 0.276 |
|            | 1 Fe               | 2.99    | 380                                      |       |
| 4          | 6 O/N              | 2.02    | 820                                      | 0.241 |
|            | 1 Fe               | 3.00    | 400                                      |       |
|            | 5 C                | 2.94    | 1160                                     |       |
| 5          | 6 O/N              | 2.02    | 840                                      | 0.178 |
|            | 5 C                | 3.00    | 270                                      |       |
|            | 3 O/C              | 3.32    | 380                                      |       |
|            | 8 C/N-C            | 4.28    | 880                                      |       |
|            | 10 C               | 4.92    | 930                                      |       |
| 6          | 6 O/N              | 2.01    | 830                                      | 0.174 |
|            | 1 Fe               | 3.00    | 480                                      |       |
|            | 5 C                | 2.97    | 1430                                     |       |
|            | 3 O/C              | 3.30    | 710                                      |       |
|            | 8 C/N-C            | 4.27    | 860                                      |       |
|            | 10 C               | 4.91    | 940                                      |       |

<sup>a</sup> Errors are estimated to be 25 % for coordination numbers and 0.01 – 0.03 Å for distances.

<sup>b</sup> Error ( $F$ ) is defined as  $F = [\sum k^6 (\chi_{\text{exptl}} - \chi_{\text{calcd}})^2] / [\sum k^6 \chi_{\text{exptl}}^2]$ .

<sup>c</sup> Scatterers differing by  $Z = \pm 1$  are not distinguishable by EXAFS. The first element in a pair indicates the type of atom used to model the backscattered wave in the theoretical fit.

**Table S4.** EXAFS Fit Results for **10**.<sup>a</sup>

| Fit number |         | $R$ (Å) | $\sigma^2 \times 10^6$ (Å <sup>2</sup> ) | $F^b$ |
|------------|---------|---------|------------------------------------------|-------|
| 1          | 6 O/N   | 2.04    | 1290                                     | 0.525 |
| 2          | 6 O/N   | 2.05    | 1300                                     | 0.331 |
|            | 5 C     | 3.04    | 340                                      |       |
| 3          | 6 O/N   | 2.04    | 1290                                     | 0.311 |
|            | 1 Fe    | 3.02    | 460                                      |       |
| 4          | 6 O/N   | 2.05    | 1280                                     | 0.280 |
|            | 1 Fe    | 3.03    | 500                                      |       |
|            | 5 C     | 3.00    | 1524                                     |       |
| 5          | 6 O/N   | 2.05    | 1290                                     | 0.235 |
|            | 5 C     | 3.03    | 380                                      |       |
|            | 3 O     | 3.34    | 530                                      |       |
|            | 8 C/N-C | 4.38    | 890                                      |       |
|            | 10 C    | 4.99    | 1000                                     |       |
| 6          | 6 O     | 2.05    | 1290                                     | 0.217 |
|            | 1 Fe    | 3.07    | 470                                      |       |
|            | 5 C     | 2.99    | 580                                      |       |
|            | 3 O     | 3.27    | 850                                      |       |
|            | 8 C/N-C | 4.38    | 760                                      |       |
|            | 10 C    | 4.99    | 1000                                     |       |

<sup>a</sup> Errors are estimated to be 25 % for coordination numbers and 0.01 – 0.03 Å for distances.

<sup>b</sup> Error ( $F$ ) is defined as  $F = [\sum k^6 (\chi_{\text{exptl}} - \chi_{\text{calcd}})^2] / [\sum k^6 \chi_{\text{exptl}}^2]$ .

<sup>c</sup> Scatterers differing by  $Z = \pm 1$  are not distinguishable by EXAFS. The first element in a pair indicates the type of atom used to model the backscattered wave in the theoretical fit.
